# Supplementary material for: Sensitive and accurate determination of REEs using a high-efficiency miniaturized ultrasonic nebulization sampling system coupled with the inductively coupled plasma mass spectrometer
Source: Royal Society of Chemistry journal article supplement (doi:10.1039/d3ja00230f), 2023-01-01
Supplement: d3ja00230f1.pdf [file d3ja00230f1.pdf]

**Sensitive and accurate determination of REEs by highly-  
efficiency miniaturized ultrasonic nebulization sampling system  
coupled with inductively coupled plasma mass spectrometry**

Junhang Dong,<sup>1,2,#</sup> Meihua Chen<sup>3,#</sup>, Lujie Li,<sup>1,2</sup> Pengju Xing,<sup>1</sup> Shuyang Li,<sup>1</sup> Zhe Zhang,<sup>1</sup> Jingwen Zhang,<sup>1</sup> Jinzhao Liu,<sup>2</sup> Xing Liu,<sup>1</sup> Wenkai Zhang<sup>1,2</sup>, Huan Tian,<sup>2</sup> Hongtao Zheng<sup>2</sup> and Zhenli Zhu,<sup>1,2,4\*</sup>

<sup>1</sup> State Key Laboratory of Biogeology and Environmental Geology, School of Earth Sciences, China University of Geosciences, Wuhan 430074, China

<sup>2</sup> Faculty of Material Science and Chemistry, China University of Geosciences, Wuhan 430074, China

<sup>3</sup> Changsha Natural Resources Comprehensive Survey Center, Changsha 410000, China

<sup>4</sup> Hubei Key Laboratory of Yangtze Catchment Environmental Aquatic Science, Wuhan, 430078, China

**Correspondence and requests for materials should be addressed to:**

Dr. Zhenli Zhu, State Key Laboratory of Biogeology and Environmental Geology, China University of Geosciences, Wuhan 430074, China, Email: zlzhu@cug.edu.cn

**Table of Contents**

Section 1 The setup of the MUN unit.

Section 2 High-pressure bomb sample digestion process.

Figure S-1 The linear fit equations of the normalized signal intensities of REEs using MUN-ICP-MS with the nebulization rate increasing from 10 to 45  $\mu\text{L min}^{-1}$ .

Figure S-2 (a) Normalized signal-to-noise ratios of 16 REEs and  $\eta$  with different nebulization rate of MUN under the optimal conditions obtained by auto-tune, respectively. (b) Optimization of Ar carrier gas flow rate with the MUN nebulization rate of 30  $\mu\text{L min}^{-1}$ .

Figure S-3 The calibration curve of REEs in MUN-ICP-MS with the low REEs concentrations ranging from 0.03 to 0.30 ng mL<sup>-1</sup> and high REEs concentrations ranging from 1 to 20 ng mL<sup>-1</sup>.

Figure S-4 The reproducibility of REEs signal intensities measured at the concentration of (a) 1 ng mL<sup>-1</sup> and (b) 10 ng mL<sup>-1</sup> by MUN-ICP-MS (N = 8).

Figure S-5 The comparison of the Gd measured values of GSD-10, GSS-7, GSS-9, GSS-12, BCR-2, and BHVO-2 using the MUN-ICP-MS by choosing the <sup>157</sup>Gd without any correction and the <sup>160</sup>Gd with the mathematical correction.

Table S-1 Instrumental operating conditions and data acquisition parameters for PN-ICP-MS and MUN-ICP-MS.

Table S-2 Analysis and rinsing process settings for MUN-ICP-MS.

Table S-3 Comparison of sample introduction efficiency ( $\eta$ ) with different MUN nebulization rate.

Table S-4 The voltage of square waveform of MUN selected at different duty ratios.

Table S-5 Measurement results (N = 3) of REEs mass fractions in two sediments (GSD-10, GSS-9) and two soils (GSS-7, GSS-12) CRMs using the MUN-ICP-MS.

Table S-6 Measurement results (N = 3) of REEs mass fractions in two basalt CRMs (BCR-2 and BHVO-2) using the MUN-ICP-MS.

## **Reference.**

## **Section 1. The setup of the MUN unit.**

The MUN sheet is connected with the spray chamber by using an O-ring (i.d. 10 mm, o.d. 16 mm) with super glue (3M). A peristaltic pump that comes with the ICP-MS instrument provides the introduction of sample solution with a pump tube (i.d. 0.25 mm). The front end of the pump tube is connected with a PFA capillary (i.d. 0.1 mm), and the rear end is connected to a quartz capillary (i.d. 30  $\mu\text{m}$ ), which is kept horizontal and the outlet of the quartz capillary located above the central area of the MUN with a very short interval of about 0.1 mm. The capillary was positioned horizontally, which forms an angle of 90° to the surface of the MUN. Under operation, liquid was allowed to flow onto the central area of transducer, where nebulization occurred.

## **Section 2. High-pressure bomb sample digestion process.**

For the four sediments and soils CRMs standard samples, 100 mg of samples powder were precisely weighed into a PTFE-lined stainless-steel bomb, and then 1.0 mL concentrated HNO<sub>3</sub> and 1.0 mL HF were slowly added. Digestion blank was also set for digestion process. After that, the bombs were sealed and heated to 190°C in an electric oven for 48 hours to ensure complete digestion. After cooling, the bombs were opened and placed on a hotplate to evaporate the sample solutions at 100°C. Then, 1 mL concentration HNO<sub>3</sub> was added and evaporated to dryness at 100°C in order to remove HF. After that, 3 mL 30% HNO<sub>3</sub> was added, and the bombs were sealed again and heated in an oven at 190°C for 12 hours. After cooling, the bombs were opened and the solutions were transferred to PFA beakers. These beakers were placed on a hotplate at 100°C to evaporate the sample solutions. Then, 0.5 mL DI-water was added and evaporated to dryness at 100°C again in order to remove HNO<sub>3</sub> completely and redissolved in 8 mL 2% HNO<sub>3</sub>.

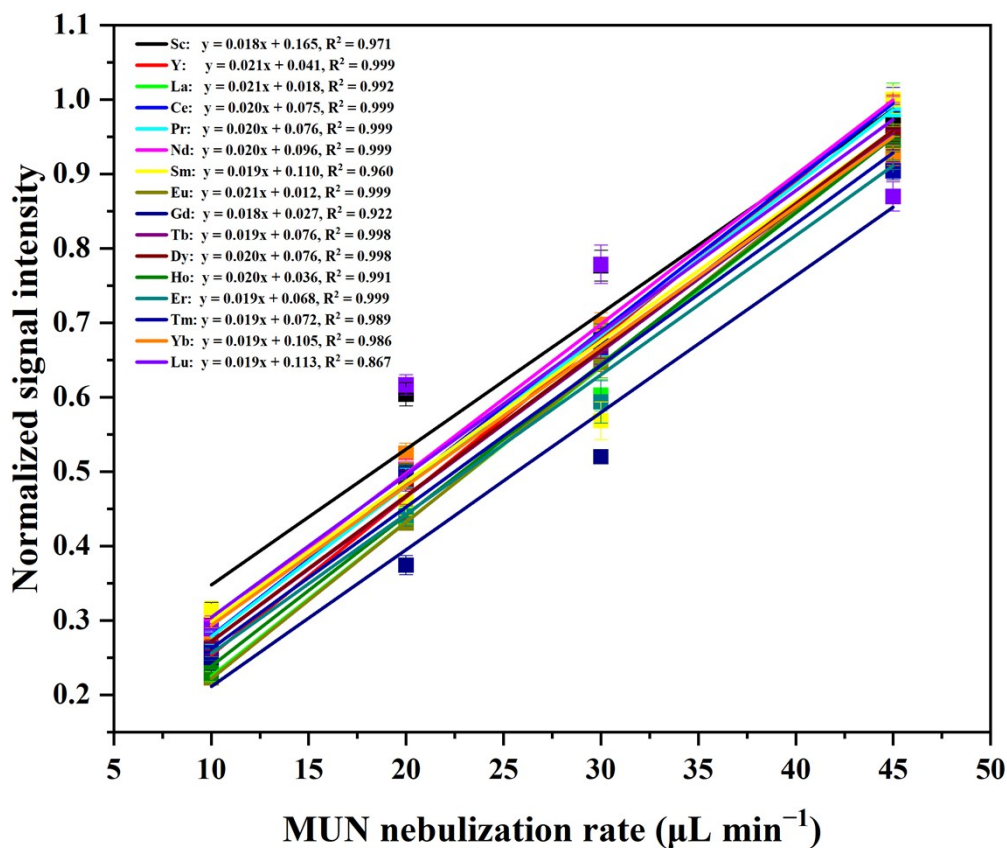

Figure S-1. The linear fit equations of the normalized signal intensities of REEs using MUN-ICP-MS with the nebulization rate increasing from 10 to 45  $\mu\text{L min}^{-1}$ . The signal intensities of REEs are independently normalized by maximum value. Each point is the average from six measurements ( $n = 6$ ) with the error bars defined as  $\pm$  SD.

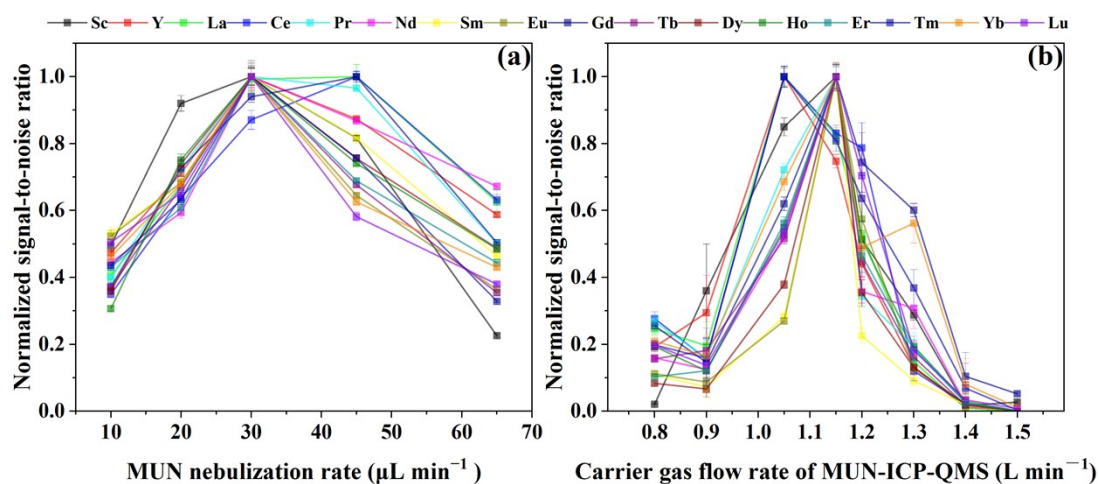

Figure S-2. (a) Normalized signal-to-noise ratios of 16 REEs with different nebulization rate of MUN under the optimal conditions obtained by auto-tune, respectively. (b) Optimization of Ar carrier gas flow rate with the MUN nebulization rate of  $30 \mu\text{L min}^{-1}$ . Square waveform with duty ratio of 50% was set for MUN. (Signal-to-noise ratios of REEs are independently normalized by maximum value, each point is the average from six measurements ( $n = 6$ ) with the error bars defined as  $\pm \text{SD}$ )

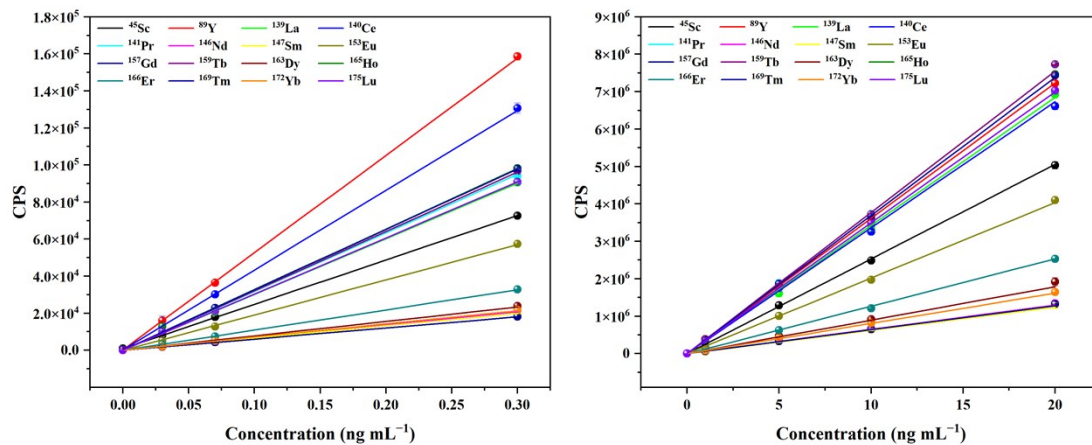

Figure S-3 Calibration curve of REEs in MUN-ICP-MS with the low REEs concentrations ranging from 0.03 to 0.30 ng mL<sup>-1</sup> and high REEs concentrations ranging from 1 to 20 ng mL<sup>-1</sup>. Each point is the average from 3 measurements (n = 3) with the error bars defined as  $\pm$  SD.

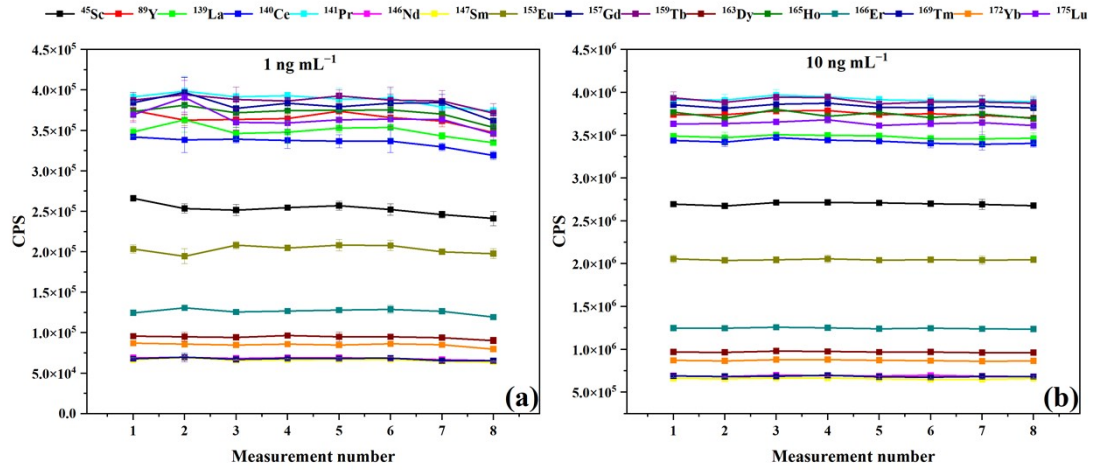

Figure S-4 The reproducibility of REEs signal intensities measured at the concentration of (a) 1 ng mL<sup>-1</sup> and (b) 10 ng mL<sup>-1</sup> by MUN-ICP-MS (N = 8). (Each point is the average intensity within a single analysis time and the error bars are defined as the internal precision of a single analysis)



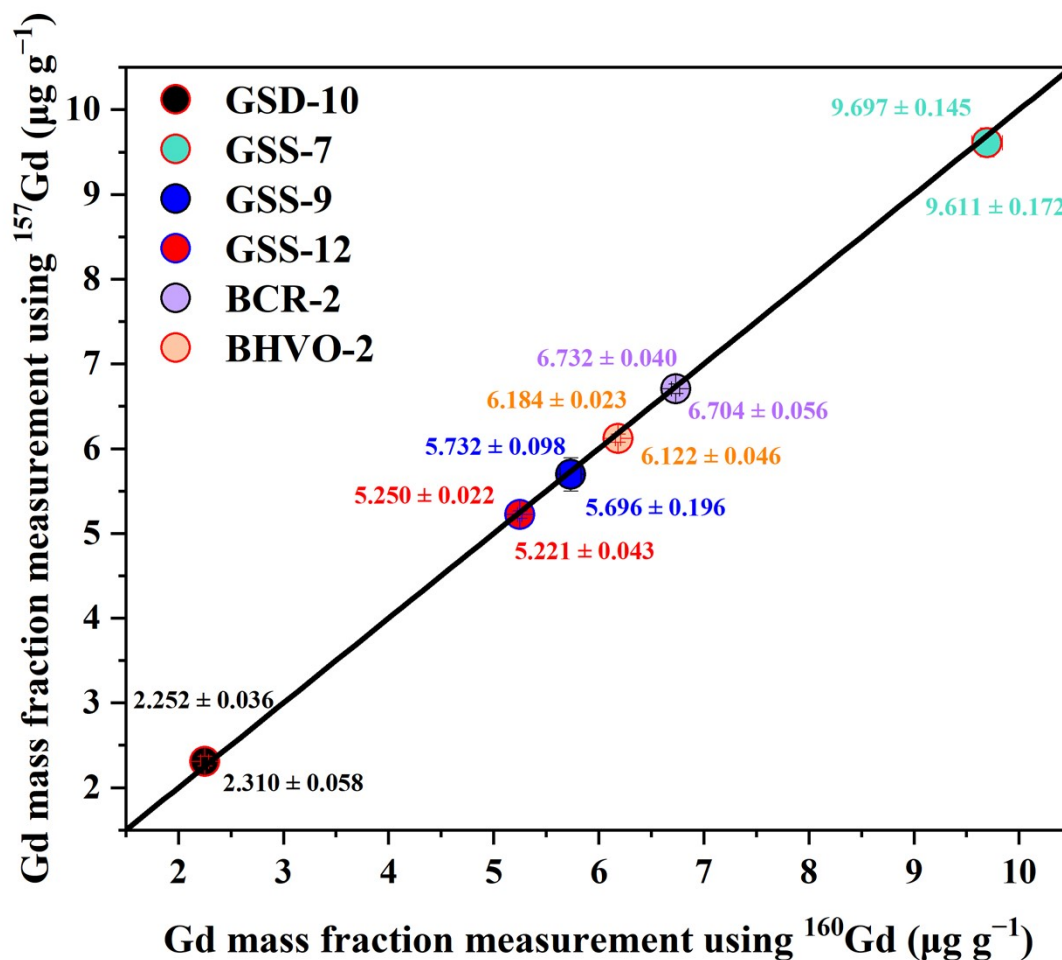

Figure S-5 The comparison of the Gd measured values of GSD-10, GSS-7, GSS-9, GSS-12, BCR-2, and BHVO-2 using the MUN-ICP-MS by choosing the  $^{157}\text{Gd}$  without any correction and the  $^{160}\text{Gd}$  with the mathematical correction ( $M_c(160) = M(160) * 1 - M(163) * 0.09357$ ). Each point is the average from 3 measurements ( $n = 3$ ) with the error bars defined as  $\pm$  SD.

Table S-1 Instrumental operating conditions and data acquisition parameters for PN-ICP-MS and MUN-ICP-MS.

| Parameter                            | PN-ICP-MS                                                                                                                                                                                                                                                                                    | MUN-ICP-MS                     |
|--------------------------------------|----------------------------------------------------------------------------------------------------------------------------------------------------------------------------------------------------------------------------------------------------------------------------------------------|--------------------------------|
| Plasma power (W)                     | 1550                                                                                                                                                                                                                                                                                         |                                |
| Plasma gas (L min <sup>-1</sup> )    | 15.0                                                                                                                                                                                                                                                                                         |                                |
| Auxiliary gas (L min <sup>-1</sup> ) | 0.9                                                                                                                                                                                                                                                                                          |                                |
| Sampling depth (mm)                  | 8.0                                                                                                                                                                                                                                                                                          |                                |
| Interface cones                      | Nickel                                                                                                                                                                                                                                                                                       |                                |
| Extract 1 (V)                        | 20.0                                                                                                                                                                                                                                                                                         |                                |
| Extract 2 (V)                        | -90                                                                                                                                                                                                                                                                                          |                                |
| Omega Bias (V)                       | -90                                                                                                                                                                                                                                                                                          |                                |
| Omega Lens (V)                       | 8.0                                                                                                                                                                                                                                                                                          |                                |
| Cell Entrance (V)                    | -30                                                                                                                                                                                                                                                                                          |                                |
| Cell Exit (V)                        | -50                                                                                                                                                                                                                                                                                          |                                |
| Deflect (V)                          | 15.4                                                                                                                                                                                                                                                                                         |                                |
| Plate Bias (V)                       | -35                                                                                                                                                                                                                                                                                          |                                |
| He flow rate (mL min <sup>-1</sup> ) | CRC activated: 2<br>CRC inactivated: 0                                                                                                                                                                                                                                                       |                                |
| Octp Bias (V)                        | -8.0                                                                                                                                                                                                                                                                                         |                                |
| Octp RF (V)                          | 200                                                                                                                                                                                                                                                                                          |                                |
| Energy Discrimination (V)            | 5.0                                                                                                                                                                                                                                                                                          |                                |
| Monitored isotopes                   | <sup>89</sup> Y, <sup>139</sup> La, <sup>140</sup> Ce, <sup>141</sup> Pr, <sup>146</sup> Nd, <sup>147</sup> Sm, <sup>153</sup> Eu, <sup>157</sup> Gd,<br><sup>159</sup> Tb, <sup>163</sup> Dy, <sup>165</sup> Ho, <sup>166</sup> Er, <sup>169</sup> Tm, <sup>172</sup> Yb, <sup>175</sup> Lu |                                |
| Signal processing                    | 3 points per peak                                                                                                                                                                                                                                                                            |                                |
| Sweep                                | 100                                                                                                                                                                                                                                                                                          |                                |
| Integration time (s)                 | 0.1                                                                                                                                                                                                                                                                                          |                                |
| Replicates                           | 3                                                                                                                                                                                                                                                                                            |                                |
| Nebulizer                            | MicroMist (340 μL min <sup>-1</sup> )                                                                                                                                                                                                                                                        | MUN (30 μL min <sup>-1</sup> ) |
| Carrier Gas (L min <sup>-1</sup> )   | 1.10                                                                                                                                                                                                                                                                                         | 1.15                           |
| Analysis time (s)                    | 30                                                                                                                                                                                                                                                                                           | 30                             |

Table S-2. Analysis and rinsing process settings for MUN-ICP-MS.

| <b>Step</b> | <b>Operation settings</b>                                                                                     | <b>Time (s)</b> |
|-------------|---------------------------------------------------------------------------------------------------------------|-----------------|
| 1           | MUN: stop; Sample solution uptake: 60 $\mu\text{L min}^{-1}$ (Sample solution)                                | 2               |
| 2           | MUN: 0.11 W (30 $\mu\text{L min}^{-1}$ ); Sample solution uptake: 30 $\mu\text{L min}^{-1}$ (Sample solution) | 30              |
| 3           | MUN: 0.11 W (30 $\mu\text{L min}^{-1}$ ); Sample solution uptake: stop                                        | 8               |
| 4           | MUN: 0.11 W (30 $\mu\text{L min}^{-1}$ ); Sample solution uptake: 30 $\mu\text{L min}^{-1}$ (UPW)             | 15              |
| 5           | MUN: 0.11 W (30 $\mu\text{L min}^{-1}$ ); Sample solution uptake: Stop                                        | 2               |

Table S-3. Comparison of sample introduction efficiency ( $\eta$ ) with different MUN nebulization rate.

| <b>Nebulization rate of MUN (<math>\mu\text{L min}^{-1}</math>)</b> | <b>MUN power (W)</b> | <b>Running time (min)</b> | <b>Feed (g)</b> | <b>Chambe r weight before sampling (g)</b> | <b>Chambe r weight after sampling (g)</b> | <b>Waste (g)</b> | <b><math>\eta</math></b> |
|---------------------------------------------------------------------|----------------------|---------------------------|-----------------|--------------------------------------------|-------------------------------------------|------------------|--------------------------|
| 10                                                                  | 0.05                 | 30                        | 0.321           | 13.228                                     | 13.228                                    | /                | 100%                     |
|                                                                     | 0.05                 | 60                        | 0.629           | 13.228                                     | 13.228                                    | /                | 100%                     |
| 20                                                                  | 0.08                 | 30                        | 0.624           | 13.228                                     | 13.228                                    | /                | 100%                     |
|                                                                     | 0.08                 | 60                        | 1.298           | 13.228                                     | 13.228                                    | /                | 100%                     |
| 30                                                                  | 0.11                 | 30                        | 0.925           | 13.228                                     | 13.228                                    | /                | 100%                     |
|                                                                     | 0.11                 | 60                        | 1.782           | 13.228                                     | 13.228                                    | /                | 100%                     |
| 45                                                                  | 0.15                 | 5                         | 0.233           | 13.228                                     | 13.299                                    | 0.024            | 89.7%                    |
|                                                                     | 0.15                 | 5                         | 0.231           | 13.228                                     | 13.293                                    | 0.022            | 90.3%                    |
| 65                                                                  | 0.22                 | 5                         | 0.330           | 13.228                                     | 13.397                                    | 0.070            | 78.9%                    |
|                                                                     | 0.22                 | 5                         | 0.337           | 13.228                                     | 13.399                                    | 0.064            | 81.1%                    |

Table S-4 The voltage of square waveform of MUN selected at different duty ratios.

| <b>Duty ratio/%</b> | <b>voltage/V</b> |
|---------------------|------------------|
| 20                  | 15.2             |
| 30                  | 14.0             |
| 40                  | 12.6             |
| 50                  | 12.4             |
| 60                  | 12.0             |
| 80                  | 11.8             |

Table S-5 Measured results (N = 3) of REEs mass fractions in two sediments (GSD-10, GSS-9) and two soils (GSS-7, GSS-12) CRMs using the MUN-ICP-MS. The measured values are the average from 3 measurements (n = 3) by MUN-ICP-MS with the uncertainties error bars defined as  $\pm$  SD.

| Element | GSD-10 ( $\mu\text{g g}^{-1}$ ) |                         |                               | GSS-7 ( $\mu\text{g g}^{-1}$ ) |                        |                               | GSS-9 ( $\mu\text{g g}^{-1}$ ) |                               | GSS-12 ( $\mu\text{g g}^{-1}$ ) |                               |
|---------|---------------------------------|-------------------------|-------------------------------|--------------------------------|------------------------|-------------------------------|--------------------------------|-------------------------------|---------------------------------|-------------------------------|
|         | Measured*                       | Certified <sup>#1</sup> | Recommended <sup>&amp;1</sup> | Measured*                      | Certified <sup>#</sup> | Recommended <sup>&amp;1</sup> | Measured*                      | Recommended <sup>&amp;2</sup> | Measured*                       | Recommended <sup>&amp;3</sup> |
| Sc      | 3.92 $\pm$ 0.07                 | 3.22 $\pm$ 0.14         | 4.1 $\pm$ 0.4                 | 26.93 $\pm$ 0.24               | 26.5 $\pm$ 0.1         | 28.0 $\pm$ 2.0                | 12.21 $\pm$ 0.22               | 12 $\pm$ 2                    | 12.49 $\pm$ 0.37                | 12.6 $\pm$ 0.4                |
| Y       | 13.64 $\pm$ 0.11                | 13.4 $\pm$ 0.5          | 14.0 $\pm$ 2.0                | 28.16 $\pm$ 0.04               | 28.8 $\pm$ 0.8         | 27.0 $\pm$ 4.0                | 25.74 $\pm$ 0.13               | 25.0 $\pm$ 2.0                | 26.87 $\pm$ 0.16                | 26.4 $\pm$ 0.9                |
| La      | 12.23 $\pm$ 0.13                | 12.1 $\pm$ 0.3          | 13.0 $\pm$ 0.9                | 45.14 $\pm$ 0.19               | 46.1 $\pm$ 0.9         | 46.0 $\pm$ 5.0                | 38.87 $\pm$ 0.23               | 38.0 $\pm$ 3.0                | 30.01 $\pm$ 0.23                | 29.0 $\pm$ 2.0                |
| Ce      | 37.13 $\pm$ 0.33                | 37.4 $\pm$ 0.6          | 38 $\pm$ 4.0                  | 105.69 $\pm$ 0.57              | 104.0 $\pm$ 1.0        | 98.0 $\pm$ 11.0               | 73.71 $\pm$ 0.38               | 74.0 $\pm$ 4.0                | 56.66 $\pm$ 0.20                | 57.0 $\pm$ 2.0                |
| Pr      | 2.897 $\pm$ 0.050               | 2.91 $\pm$ 0.09         | 3.2 $\pm$ 0.4                 | 10.94 $\pm$ 0.21               | 11.4 $\pm$ 0.2         | 11.0 $\pm$ 1.0                | 8.333 $\pm$ 0.095              | 8.5 $\pm$ 0.7                 | 6.881 $\pm$ 0.048               | 7.0 $\pm$ 0.4                 |
| Nd      | 10.98 $\pm$ 0.24                | 10.8 $\pm$ 0.3          | 11.8 $\pm$ 1.1                | 43.77 $\pm$ 0.26               | 44.8 $\pm$ 1.0         | 45.0 $\pm$ 2.0                | 32.07 $\pm$ 0.31               | 32.0 $\pm$ 3.0                | 27.17 $\pm$ 0.36                | 27.9 $\pm$ 1.2                |
| Sm      | 2.348 $\pm$ 0.026               | 2.33 $\pm$ 0.01         | 2.4 $\pm$ 0.2                 | 9.847 $\pm$ 0.182              | 10.3 $\pm$ 0.1         | 10.3 $\pm$ 0.4                | 6.224 $\pm$ 0.159              | 6.2 $\pm$ 0.5                 | 5.770 $\pm$ 0.136               | 5.6 $\pm$ 0.4                 |
| Eu      | 0.4544 $\pm$ 0.0069             | 0.45 $\pm$ 0.02         | 0.47 $\pm$ 0.04               | 3.453 $\pm$ 0.043              | 3.41 $\pm$ 0.04        | 3.40 $\pm$ 0.20               | 1.273 $\pm$ 0.008              | 1.27 $\pm$ 0.11               | 1.245 $\pm$ 0.018               | 1.22 $\pm$ 0.04               |
| Gd      | 2.252 $\pm$ 0.036               | 2.17 $\pm$ 0.09         | 2.2 $\pm$ 0.2                 | 9.697 $\pm$ 0.145              | 9.25 $\pm$ 0.12        | 9.6 $\pm$ 0.9                 | 5.732 $\pm$ 0.098              | 5.4 $\pm$ 0.6                 | 5.250 $\pm$ 0.022               | 5.1 $\pm$ 0.3                 |
| Tb      | 0.3589 $\pm$ 0.0024             | 0.36 $\pm$ 0.01         | 0.42 $\pm$ 0.1                | 1.310 $\pm$ 0.037              | 1.35 $\pm$ 0.01        | 1.30 $\pm$ 0.20               | 0.8756 $\pm$ 0.0077            | 0.86 $\pm$ 0.12               | 0.8504 $\pm$ 0.0188             | 0.84 $\pm$ 0.06               |
| Dy      | 2.198 $\pm$ 0.042               | 2.18 $\pm$ 0.12         | 2.2 $\pm$ 0.3                 | 6.581 $\pm$ 0.037              | 6.37 $\pm$ 0.21        | 6.6 $\pm$ 0.6                 | 4.754 $\pm$ 0.101              | 4.7 $\pm$ 0.4                 | 4.927 $\pm$ 0.033               | 4.9 $\pm$ 0.3                 |
| Ho      | 0.4469 $\pm$ 0.0046             | 0.45 $\pm$ 0.01         | 0.45 $\pm$ 0.07               | 1.151 $\pm$ 0.018              | 1.11 $\pm$ 0.03        | 1.10 $\pm$ 0.20               | 1.021 $\pm$ 0.005              | 1.03 $\pm$ 0.07               | 1.015 $\pm$ 0.010               | 1.01 $\pm$ 0.04               |
| Er      | 1.279 $\pm$ 0.032               | 1.29 $\pm$ 0.09         | 1.3 $\pm$ 0.2                 | 2.852 $\pm$ 0.073              | 2.57 $\pm$ 0.10        | 2.7 $\pm$ 0.5                 | 2.881 $\pm$ 0.023              | 2.8 $\pm$ 0.3                 | 2.971 $\pm$ 0.050               | 2.9 $\pm$ 0.2                 |
| Tm      | 0.1883 $\pm$ 0.0040             | 0.19 $\pm$ 0.01         | 0.20 $\pm$ 0.03               | 0.3941 $\pm$ 0.0091            | 0.38 $\pm$ 0.02        | 0.42 $\pm$ 0.05               | 0.435 $\pm$ 0.007              | 0.42 $\pm$ 0.06               | 0.4577 $\pm$ 0.0089             | 0.44 $\pm$ 0.05               |
| Yb      | 1.198 $\pm$ 0.027               | 1.21 $\pm$ 0.07         | 1.2 $\pm$ 0.2                 | 2.343 $\pm$ 0.026              | 2.22 $\pm$ 0.04        | 2.4 $\pm$ 0.4                 | 2.570 $\pm$ 0.014              | 2.6 $\pm$ 0.4                 | 3.022 $\pm$ 0.046               | 2.9 $\pm$ 0.2                 |
| Lu      | 0.1755 $\pm$ 0.0033             | 0.18 $\pm$ 0.01         | 0.19 $\pm$ 0.03               | 0.3435 $\pm$ 0.0098            | 0.32 $\pm$ 0.01        | 0.35 $\pm$ 0.06               | 0.416 $\pm$ 0.009              | 0.41 $\pm$ 0.03               | 0.4489 $\pm$ 0.0043             | 0.46 $\pm$ 0.02               |

\*this work

<sup>#</sup>Certified values reported by Liang and Gregoire.<sup>1</sup>

<sup>&1</sup>Recommend values reported by Govindaraju.<sup>2</sup>

<sup>&2</sup>Recommend values reported by Wang et. al.<sup>3</sup>

<sup>&3</sup>Recommend values reported by Gu et. al.<sup>4</sup>

Table S-6 Measured results (N = 3) of REEs mass fractions in two basalt CRMs (BCR-2 and BHVO-2) using the MUN-ICP-MS. The measured values are the average from 3 measurements (n = 3) by MUN-ICP-MS with the uncertainties error bars defined as  $\pm$  SD.

| Element | BCR-2 ( $\mu\text{g g}^{-1}$ ) |                        | BHVO-2 ( $\mu\text{g g}^{-1}$ ) |                        |
|---------|--------------------------------|------------------------|---------------------------------|------------------------|
|         | Measured*                      | Certified <sup>#</sup> | Measured*                       | Certified <sup>#</sup> |
| Sc      | 33.79 $\pm$ 0.34               | 33.53 $\pm$ 0.4        | 32.32 $\pm$ 0.17                | 31.83 $\pm$ 0.34       |
| Y       | 35.87 $\pm$ 0.24               | 36.07 $\pm$ 0.37       | 25.75 $\pm$ 0.33                | 25.91 $\pm$ 0.28       |
| La      | 25.32 $\pm$ 0.39               | 25.08 $\pm$ 0.16       | 15.43 $\pm$ 0.16                | 15.2 $\pm$ 0.08        |
| Ce      | 53.49 $\pm$ 0.27               | 53.12 $\pm$ 0.33       | 37.55 $\pm$ 0.14                | 37.53 $\pm$ 0.19       |
| Pr      | 6.764 $\pm$ 0.041              | 6.827 $\pm$ 0.044      | 5.360 $\pm$ 0.077               | 5.339 $\pm$ 0.028      |
| Nd      | 28.84 $\pm$ 0.48               | 28.26 $\pm$ 0.37       | 24.34 $\pm$ 0.28                | 24.27 $\pm$ 0.25       |
| Sm      | 6.540 $\pm$ 0.121              | 6.547 $\pm$ 0.047      | 6.045 $\pm$ 0.058               | 6.032 $\pm$ 0.057      |
| Eu      | 2.036 $\pm$ 0.030              | 1.989 $\pm$ 0.024      | 2.077 $\pm$ 0.020               | 2.043 $\pm$ 0.012      |
| Gd      | 6.732 $\pm$ 0.040              | 6.811 $\pm$ 0.078      | 6.375 $\pm$ 0.024               | 6.207 $\pm$ 0.038      |
| Tb      | 1.070 $\pm$ 0.025              | 1.077 $\pm$ 0.026      | 0.9378 $\pm$ 0.0069             | 0.9392 $\pm$ 0.006     |
| Dy      | 6.404 $\pm$ 0.047              | 6.424 $\pm$ 0.055      | 5.313 $\pm$ 0.025               | 5.280 $\pm$ 0.028      |
| Ho      | 1.329 $\pm$ 0.029              | 1.313 $\pm$ 0.011      | 0.9818 $\pm$ 0.0086             | 0.9887 $\pm$ 0.0053    |
| Er      | 3.636 $\pm$ 0.018              | 3.670 $\pm$ 0.038      | 2.550 $\pm$ 0.036               | 2.511 $\pm$ 0.014      |
| Tm      | 0.5396 $\pm$ 0.0073            | 0.5341 $\pm$ 0.006     | 0.3378 $\pm$ 0.0059             | 0.3349 $\pm$ 0.0031    |
| Yb      | 3.3619 $\pm$ 0.0289            | 3.392 $\pm$ 0.036      | 1.987 $\pm$ 0.007               | 1.994 $\pm$ 0.027      |
| Lu      | 0.5115 $\pm$ 0.0042            | 0.5049 $\pm$ 0.0078    | 0.2702 $\pm$ 0.0026             | 0.2754 $\pm$ 0.0024    |

\*this work

<sup>#</sup>Certified values reported by Jochum et. al.<sup>5</sup>

## References

1. Q. Liang and D. C. Gregoire, Determination of trace elements in twenty six Chinese geochemistry reference materials by inductively coupled plasma-mass spectrometry, *Geostand. Geoanal. Res.*, 2000, **24**, 51-63.
2. K. Govindaraju, 1994 compilation of working values and sample description for 383 geostandards, *Geostand. Geoanal. Res.*, 1994, **18**, 1-158.
3. C. S. Wang, T. X. Gu, Q. H. Chi, W. D. Yan and M. C. Yan, New series of rock and sediment geochemical reference materials, *Geostand. Geoanal. Res.*, 2001, **25**, 145-152.
4. T. X. Gu, W. D. Yan, C. Y. Shi, M. C. Yan and W. Bo, New series of soil geochemical reference materials (GSS 10-16) from the main overburden region in China, *Geostand. Geoanal. Res.*, 2003, **27**, 197-202.
5. K. P. Jochum, U. Weis, B. Schwager, B. Stoll, S. A. Wilson, G. H. Haug, M. O. Andreae and J. Enzweiler, Reference values following ISO guidelines for frequently requested rock reference materials, *Geostand. Geoanal. Res.*, 2016, **40**, 333-350.
